# Supplementary material for: Role of children in the transmission of the COVID-19 pandemic: a rapid scoping review
Source: PubMed Central journal article supplement — BMJ Paediatr Open. 2020 Jun 21;4(1):e000722. doi: 10.1136/bmjpo-2020-000722 (PMC7311007; doi:10.1136/bmjpo-2020-000722), 2020-06-21
Supplement: bmjpo-2020-000722.draft_revisions.pdf [file bmjpo-2020-000722.draft_revisions.pdf]

# BMJ Paediatrics Open

BMJ Paediatrics Open is committed to open peer review. As part of this commitment we make the peer review history of every article we publish publicly available.

When an article is published we post the peer reviewers' comments and the authors' responses online. We also post the versions of the paper that were used during peer review. These are the versions that the peer review comments apply to.

The versions of the paper that follow are the versions that were submitted during the peer review process. They are not the versions of record or the final published versions. They should not be cited or distributed as the published version of this manuscript.

BMJ Paediatrics Open is an open access journal and the full, final, typeset and author-corrected version of record of the manuscript is available on our site with no access controls, subscription charges or pay-per-view fees (<http://bmjpaedsopen.bmj.com>).

If you have any questions on BMJ Paediatrics Open's open peer review process please email [info.bmjpo@bmj.com](mailto:info.bmjpo@bmj.com)

# BMJ Paediatrics Open

## **The role of children in the transmission of the COVID-19 pandemic: a scoping review**

|                               |                             |
|-------------------------------|-----------------------------|
| Journal:                      | <i>BMJ Paediatrics Open</i> |
| Manuscript ID                 | bmjpo-2020-000722           |
| Article Type:                 | Review                      |
| Date Submitted by the Author: | 01-May-2020                 |
| Complete List of Authors:     | Rajmil, Luis                |
| Keywords:                     | Epidemiology, Virology      |
|                               |                             |

SCHOLARONE™  
Manuscripts

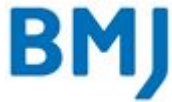

I, the Submitting Author has the right to grant and does grant on behalf of all authors of the Work (as defined in the below author licence), an exclusive licence and/or a non-exclusive licence for contributions from authors who are: i) UK Crown employees; ii) where BMJ has agreed a CC-BY licence shall apply, and/or iii) in accordance with the terms applicable for US Federal Government officers or employees acting as part of their official duties; on a worldwide, perpetual, irrevocable, royalty-free basis to BMJ Publishing Group Ltd ("BMJ") its licensees and where the relevant Journal is co-owned by BMJ to the co-owners of the Journal, to publish the Work in this journal and any other BMJ products and to exploit all rights, as set out in our [licence](#).

The Submitting Author accepts and understands that any supply made under these terms is made by BMJ to the Submitting Author unless you are acting as an employee on behalf of your employer or a postgraduate student of an affiliated institution which is paying any applicable article publishing charge ("APC") for Open Access articles. Where the Submitting Author wishes to make the Work available on an Open Access basis (and intends to pay the relevant APC), the terms of reuse of such Open Access shall be governed by a Creative Commons licence – details of these licences and which [Creative Commons](#) licence will apply to this Work are set out in our licence referred to above.

Other than as permitted in any relevant BMJ Author's Self Archiving Policies, I confirm this Work has not been accepted for publication elsewhere, is not being considered for publication elsewhere and does not duplicate material already published. I confirm all authors consent to publication of this Work and authorise the granting of this licence.

1  
2  
3 Title:

4  
5 **The role of children in the transmission of the COVID-19 pandemic: a scoping review**  
6  
7  
8  
9

10 Author: Luis Rajmil

11  
12 Pediatrician and Epidemiology and Public Health Specialist. Retired  
13  
14

15  
16 Address: Homer 22, 1rst , 1. Barcelona 08023, Spain  
17  
18

19  
20 E-mail: [12455lrr@comb.cat](mailto:12455lrr@comb.cat)  
21  
22  
23  
24  
25

26 **Abstract**

27  
28 As a response to the COVID-19 pandemic most countries adopted measures of social distance,  
29 with childhood population being one of the main focus of attention in these measures. A brief  
30 scoping review was carried out by searching PubMed to know if children are more contagious  
31 than adults, and the proportion of asymptomatics. Nine out of 761 identified articles were  
32 finally included. Studies included cases from China (N= 9 to 2143), China and Taiwan (n=536),  
33 Korea (n=1), and Vietnam (N=1). Although no complete data were available, between 15% and  
34 55-60% were asymptomatic, and 75-100% of cases were from family transmission. This review  
35 suggest that children are not transmitter to a greater extent than adults, highlight the need for  
36 improve the validity of epidemiologic surveillance to solve current uncertainties, and to take  
37 into account social determinants and child health inequalities during and after the current  
38 pandemic.  
39  
40  
41  
42

43 **Keywords:** children, COVID-19; transmission  
44

45 Number of words in the text: 1297

46 Number of words n the abstract: 144

47 References: 27

48 Tables: 1  
49  
50  
51  
52  
53  
54  
55  
56  
57  
58  
59  
60

## Intro

The COVID-19 pandemic started in late 2019 in China has represented a substantial change in the health of the population worldwide, especially for families and children.<sup>1,2</sup> This pandemic and the lack of effective treatment so far until now, highlight the need to take measures to prevent the spread of the infection. Measures adopted based on the best scientific available evidence were usually according to previous knowledge mainly based on other pandemics. Nevertheless, it should also be taken into account the data available from the current pandemic given there are several unknown questions. In the current situation measures taken to prevent the spread of the pandemic are generally based on the precautionary principle, and these measures should balance the potential side effects with the infection itself.

In the case of children, data available seems to indicate that they are equally susceptible to presenting infectious symptoms, although less severe compared to the adult population and the elderly.<sup>3</sup> At the moment there are no certainties about the possible causes of this situation. There is also insufficient information on the child population as a vector of transmission of the infection. Despite this, in the majority of countries one of the first measures adopted has been the closure of schools and even in some countries, such as Spain, the house confinement of all minors was specifically decided for at least 45 days.<sup>4</sup> These strict measures taken with children are probably associated with experiences in previous epidemics like influenza where children had a central role in the spread of this virus in the community during epidemics.<sup>5</sup> Up to date there are many uncertainties regarding these issues in the current COVID-19 pandemic.

Given this situation and the uncertainty on the transmission mechanisms, prediction of severity, the spread of infection in asymptomatic patients, or immunity after infection, a systematic scoping review of the published data was carried out to try to move forward in answering the following questions: are children more contagious than adults? Are they proportionally more asymptomatic?

## Methods

A scoping literature review was carried out by search in PubMed using the following terms: "coronavirus or COVID-19 or SARS-CoV-2" and "neonates or pediatric or infant or children or adolescence" and "transmission" to find reports of pediatric COVID-19. The time period was restricted to the last four months, from December the 1st 2019 to 04/24/2020. Available full texts and the reference lists of the relevant studies were reviewed.

### Inclusion/exclusion criteria

All studies published in English, Italian, French or Spanish related to the transmission of COVID-19 in children were included, as well as those who compare the percentage of asymptomatic patients according to age and also the source of contagion when this was possible.

Studies that did not present data on childhood population were excluded, as well as those that focused the data exclusively on the level of severity and / or hospitalizations and / or pediatric intensive care units (PICU), or the treatment. All kind of studies (case series, cohort studies, comments, Editorials, etc.) were included although the emphasis was stated on those descriptive studies of cases. It is not ruled out that there may be some duplication in the cases included. A description of the results obtained was carried out. It was not attempted to rate the quality of included studies in this Review. Preprint articles and pre peer-reviewed articles were also included if they were of specific interest.

## Results

Of the 761 initial titles, 50 articles were selected for reading the full text. Of these, 9 articles were finally included.

Table 1 shows the results of included studies. Studies reported data from China, Taiwan, Korea, and Vietnam. Cao et al.<sup>6</sup> found that 2.1% of 44672 confirmed cases were children or adolescents, mainly from intrafamilial clusters. One of the larger series also based on the report of 2143 pediatric cases from China<sup>7</sup> shows that 44% were asymptomatics and the main source of transmission seems to be the family (no data available). It should be taken into account that in the latter case series only 34% of cases of COVID-19 were confirmed and 66% were suspected cases. The first case reported from Korea<sup>8</sup> (10y old) and Vietnam<sup>9</sup> (3 months old) were also associated to family transmission. A study from the hospital of Wuhan addressed to pediatric patients<sup>10</sup> found that 171 out of 1391 screened cases were positive, 15% were asymptomatic cases and 90% of confirmed cases were from family transmission. A systematic review of 9 case series included 93 cases and reported that 26% were asymptomatics, and 75% were from family transmission.<sup>11</sup> Another series of 9 cases from 14 families,<sup>12</sup> 36 cases (out of 616 population),<sup>13</sup> and 14 children (and 53 adults)<sup>14</sup> found that 6, 18, and 8 children were asymptomatics, respectively. All cases in children were from family transmission.

## Discussion

The results of the present review suggest that children would be asymptomatics as frequently as adults, and that a high percentage of reported cases came from family transmission. Although there are still many uncertainties, it does not appear that children are transmitters to a greater extent than adults. As previously mentioned, the drastic measures taken in the child population in several countries have probably been based on previous epidemics such as influenza,<sup>15</sup> without enough evidence of the current situation. Moreover, there are some theoretical reasons why school closures might be less effective in COVID-19 than in influenza outbreaks. A systematic review found that modelling studies of COVID-19 predict that school closures alone would prevent only 2–4% of deaths, much less than other social distancing interventions.<sup>16</sup>

No studies were found on the subject of the present review neither from Spain, France, Italy nor the United States, countries strongly affected by the pandemic. Studies from these countries to date have been addressed mainly to analyse severity of identified pediatric cases, the need of Pediatric Intensive Care Unit (PICU), or immune responses in children.<sup>17-20</sup> Nevertheless, the results of this review are likely to be generalisable at least in those countries where initial measures included closing schools.

Other secondary questions that come out from this review are the differences in the incubation period and the evidence that children (and probably also adults) can excrete the virus in feces.<sup>6</sup> According to some authors asymptomatic individuals can actively shed the virus. Further, the incubation period in children following exposure to the virus can range upward of 24 days.<sup>21</sup>

The importance of children in transmitting the virus still remains uncertain. Children more often have gastrointestinal symptoms compared with adults. The majority of children infected

1  
2  
3 by novel CoVID-19s have a documented household contact, often showing symptoms before  
4 them.<sup>22</sup>  
5

6 If children are important in viral transmission and amplification, social and public health  
7 policies (eg, avoiding interaction with elderly people) could be established to slow transmission  
8 and protect vulnerable populations. Nevertheless, the application of the precautionary  
9 principle should be evidence-based as much as possible and try to avoid creating adverse  
10 effects with potential medium and long-term negative impact on the childhood population. A  
11 study analysing viral load by age in a sample of 3712 patients from Berlin found no differences  
12 by age on viral loads; even in the very young patients do not differ significantly from those of  
13 adults.<sup>23</sup>  
14

15  
16 Among the limitations of the present review should be mentioned the current lack of reliable,  
17 valid and comparable data on epidemiologic surveillance,<sup>24</sup> on the diagnostic tests, and the  
18 scarce knowledge on the mechanism of transmission and prognostic.<sup>25, 26</sup> High quality  
19 epidemiological studies are necessary to solve these questions with certain plausibility. On the  
20 other hand, up to date there are scarce data on the socioeconomic factors and its influence on  
21 the current pandemic. Social determinants of child health should be addressed to enhance the  
22 positive effects and avoid the adverse effects of this pandemic on children's rights and social  
23 inequalities in children's health.<sup>27</sup>  
24  
25  
26  
27  
28  
29  
30  
31  
32  
33  
34  
35  
36  
37  
38  
39  
40  
41  
42  
43  
44  
45  
46  
47  
48  
49  
50  
51  
52  
53  
54  
55  
56  
57  
58  
59  
60

## References

1. Pandemic school closures: risks and opportunities (Ed). *Lancet Child Adolesc Health* 2020; [https://doi.org/10.1016/S2352-4642\(20\)30105-X](https://doi.org/10.1016/S2352-4642(20)30105-X)
2. Cluver L, Lachman JM, Sherr L, Wessels I, Krug E, Rakotomalala S, et al. Parenting in time of COVID-19. *Lancet* 2020; 395: [https://doi.org/10.1016/S0140-6736\(20\)30736-4](https://doi.org/10.1016/S0140-6736(20)30736-4).
3. Kelvin AA, Halperin S. COVID-19 in children: the link in the transmission chain. *Lancet Infect Dis*. 2020. doi: 10.1016/S1473-3099(20)30236-X [Epub ahead of print]
4. Spanish Ministry of Health. *Buenas prácticas en las salidas de la población infantil*. (Accessed April 27). [https://www.mscbs.gob.es/profesionales/saludPublica/ccayes/alertasActual/nCov-China/documentos/GUIA\\_DE\\_BUENAS\\_PRACTICAS\\_EN\\_LAS\\_SALIDAS\\_DE\\_LA\\_POBLACION\\_IN FANTIL\\_DURANTE\\_EL\\_ESTADO\\_DE\\_ALARMA.pdf](https://www.mscbs.gob.es/profesionales/saludPublica/ccayes/alertasActual/nCov-China/documentos/GUIA_DE_BUENAS_PRACTICAS_EN_LAS_SALIDAS_DE_LA_POBLACION_IN FANTIL_DURANTE_EL_ESTADO_DE_ALARMA.pdf).
5. Heikkinen T. Influenza in children. *Acta Pædiatrica* 2006; 95: 778-784
6. Cao Q, Chen YCh, Chen ChL, Chiu Ch. SARS-CoV-2 infection in children: Transmission dynamics and clinical characteristics. *J Formos Med Assoc* 2020; 119(3): 670–673.
7. Dong Y, Mo X, Hu Y, Xin Qi, Jiang F, Jiang Z, et al. Epidemiological characteristics of 2143 pediatric patients with 2019 coronavirus disease in China. *Pediatrics* 2020; doi: 10.1542/peds.2020-0702.
8. Park JY, Han MS, Park KU, Kim JY, Choi EH. First Pediatric Case of Coronavirus Disease 2019 in Korea. *J Korean Med Sci* 2020 Mar 23; 35(11): e124. doi: 10.3346/jkms.2020.35.e124.
9. Le HT, Nguyen LV, Tran DM, Do HT, Tran HT, Le YT, et al. The first infant case of COVID-19 acquired from a secondary transmission in Vietnam. *Lancet Child Adolesc Health* 2020 doi: 10.1016/S2352-4642(20)30091-2 [Epub ahead of print].
10. Lu X, Zhang L, Du H, Zhang J, Li YY, Qu J, et al. SARS-CoV-2 Infection in Children. *N Engl J Med* 2020. doi: 10.1056/NEJMc2005073.
11. Chang TH, Wu JL, Chang LY. Clinical characteristics and diagnostic challenges of pediatric COVID-19: A systematic review and meta-analysis. *J Formosan Med Assoc* 2020; <https://doi.org/10.1016/j.jfma.2020.04.007>.
12. Su L, Ma X, Yu H, Zhang Z, Bian P, Han Y, et al. The different clinical characteristics of corona virus disease cases between children and their families in China – the character of children with COVID-19. *Emerg Microbes Infect* 2020; 9(1): 707–713. doi: 10.1080/22221751.2020.1744483.



13. Qiu H, Wu J, Hong L, Luo Y, Song Q, Chen D. Clinical and epidemiological features of 36 children with coronavirus disease 2019 (COVID-19) in Zhejiang, China: an observational cohort study. *Lancet Infect Dis* 2020. doi: 10.1016/S1473-3099(20)30198-5 [Epub ahead of print]
14. Du W, Yu J, Wang H, Zhang X, Zhang S, Li Q, et al. Clinical characteristics of COVID-19 in children compared with adults in Shandong Province, China. *Infection* 2020: 1–8. doi: 10.1007/s15010-020-01427-2 [Epub ahead of print].
15. Wallinga J, Teunis P, Kretzschmar M. Using data on social contacts to estimate age-specific transmission parameters for respiratory spread infectious agents. *Am J Epidemiol* 2006; 164: 936–44.
16. Viner RM, Russell SJ, Croker H, Packer J, Ward J, Stansfield C, et al. School closure and management practices during coronavirus outbreaks including COVID-19: a rapid systematic review. *Lancet Child Adolesc Health* 2020; 4: 397–404.
17. Tagarro A, Epalza C, Santos M, Sanz-Santaefemia FJ, Otheo E, Moraleda C, et al. Screening and Severity of Coronavirus Disease 2019 (COVID-19) in Children in Madrid, Spain. *JAMA Pediatrics* 2020; April 8: E1-E2.
18. Cristiani L, Mancino E, Matera L, Nenna R, Pierangeli A, Scagnolari A, et al. Will children reveal their secret? The coronavirus dilemma. *Eur Respir J* 2020: 2000749. doi: 10.1183/13993003.00749-2020 [Epub ahead of print].
19. Pathak B, Salemi JL, Sobers N, Menard J, Hambleton IR. Intensive care admission in the US and modeling the number of PICU needed for children. *J Public Health Manag Pract* 2020; doi: 10.1097/PHH.0000000000001190.
20. Bialek S, Gierke R, Hughes M, McNamara LA, Pilishvili T, Skoff T. Coronavirus Disease 2019 in Children — United States. CDC COVID-19 Response Team, CDC COVID-19 Response Team. *MMWR Morb Mortal Wkly Rep* 2020; 69(14): 422–426. doi: 10.15585/mmwr.mm6914e4
21. Yonker LM, Shen K, Kinane TB. Lessons unfolding from pediatric cases of COVID-19 disease caused by SARS-CoV-2 infection. *Pediatric Pulmonol* 2020; 55:1085–1086.
22. Zimmermann P, Curtis N. Coronavirus Infections in Children Including COVID-19: An Overview of the Epidemiology, Clinical Features, Diagnosis, Treatment and Prevention Options in Children. *Pediatr Infect Dis J* 2020; 39(5): 355–368. doi: 10.1097/INF.0000000000002660
23. Pearce N, Vandenbroucke JP, VanderWeele TJ, Greenland S. Accurate Statistics on COVID-19 Are Essential for Policy Guidance and Decisions. *Am J Public Health* 2020;e1-e3. doi: 10.2105/AJPH.2020.305708.

1  
2  
3 24. Kelvin AA, Halperin S. COVID-19 in children: the link in the transmission chain. *Lancet Infect*  
4 *Dis* 2020. doi: 10.1016/S1473-3099(20)30236-X [Epub ahead of print].  
5  
6

7 25. Jones TC, Mühlemann B, Veith T, Zuchowski M, Hofmann J, Stein A, et al. An analysis of  
8 SARS-CoV-2 viral load by patient age.  
9

10 [https://zoonosen.charite.de/fileadmin/user\\_upload/microsites/m\\_cc05/virologie-](https://zoonosen.charite.de/fileadmin/user_upload/microsites/m_cc05/virologie-ccm/dateien_upload/Weitere_Dateien/analysis-of-SARS-CoV-2-viral-load-by-patient-age.pdf)  
11 [ccm/dateien\\_upload/Weitere\\_Dateien/analysis-of-SARS-CoV-2-viral-load-by-patient-age.pdf](https://zoonosen.charite.de/fileadmin/user_upload/microsites/m_cc05/virologie-ccm/dateien_upload/Weitere_Dateien/analysis-of-SARS-CoV-2-viral-load-by-patient-age.pdf)  
12  
13

14 26. Hasan A, Mehmood N, Fergie J. Coronavirus Disease (COVID-19) and Pediatric Patients: A  
15 Review of Epidemiology, Symptomatology, Laboratory and Imaging Results to Guide the  
16 Development of a Management Algorithm. *Cureus* 2020; 12(3): e7485. DOI  
17 10.7759/cureus.7485.  
18  
19

20 27. Goldhagen JL, Shenoda S, Oberg C, Mercer R, Kadir A, Raman S, et al. Rights, justice, and  
21 equity: a global agenda for child health and wellbeing. *Lancet Child Adolesc Health* 2019;  
22 [https://doi.org/10.1016/S2352-4642\(19\)30346-3](https://doi.org/10.1016/S2352-4642(19)30346-3).  
23  
24  
25  
26  
27  
28  
29  
30  
31  
32  
33  
34  
35  
36  
37  
38  
39  
40  
41  
42  
43  
44  
45  
46  
47  
48  
49  
50  
51  
52  
53  
54  
55  
56  
57  
58  
59  
60

**Table 1. Characteristics of included studies and main results**

| First author / Journal                                      | Type of study                    | Publication date | Country                                                                            | N total population               | Number of pediatric cases                                                                       | Asymptomatics                                            | Source of transmission / Observations                                                                                                                |
|-------------------------------------------------------------|----------------------------------|------------------|------------------------------------------------------------------------------------|----------------------------------|-------------------------------------------------------------------------------------------------|----------------------------------------------------------|------------------------------------------------------------------------------------------------------------------------------------------------------|
| Cao et al. <sup>6</sup><br>J Formosan Med Assoc             | Review of reported cases         | 02/26            | China / Taiwan                                                                     | 44672 laboratory confirmed cases | Number of reported cases comparing with adult population was 0.9% for <10y, and 1.2% for 10-20y | Most showed mild symptoms. No data on asymptomatic cases | Mainly intra-familial cluster circles. Children could become the main spreader when their infection is mild /Stool could be a source of transmission |
| Dong et al. <sup>7</sup><br>Pediatrics                      | Epidemiology of pediatrics cases | 03/17            | China/<br>Cases recruited from the China Center for Disease Control and prevention |                                  | 2143 pediatric cases reported; 34% onfirmed; 66% suspected                                      | 44% asymptomatics                                        | Not confirmed but family transmission seems to be the main source of cases                                                                           |
| Ji Young Park et al. <sup>8</sup><br>J Korean Med Sci       | A case study. Brief report       | 03/16            | Korea                                                                              | -                                | A 10y old girl. 1rst case detected in Korea                                                     | Mild symptoms                                            | Close contact of her uncle and mother who were confirmed                                                                                             |
| Hai T Le et al. <sup>9</sup><br>Lancet Child Adolesc Health | A case -study                    | 03/23            | Vietnam                                                                            |                                  | 3 months old girl. 1rst case of infant detected in Vietnam                                      | Nasopharyngeal swabs positive                            | Contact with her grandmother who was confirmed                                                                                                       |
| Lu X et al. <sup>10</sup>                                   | Correspondence. Serie of cases   | 03/18            | China                                                                              | Children treated                 | 171/1391 tested were (+).                                                                       | 15% asymptomatic. Three patients                         | 90% confirmed family cluster                                                                                                                         |

|                                                        |                                    |       |       |                                  |                                                |                                                                                              |                                                                                                                                 |
|--------------------------------------------------------|------------------------------------|-------|-------|----------------------------------|------------------------------------------------|----------------------------------------------------------------------------------------------|---------------------------------------------------------------------------------------------------------------------------------|
| New England J Med                                      |                                    |       |       | at the Wuhan Children's Hospital |                                                | required PICU (all with previous chronic conditions)                                         |                                                                                                                                 |
| Chang et al. <sup>11</sup><br>J Formosan Med Assoc     | Systematic review of 9 case series | 02/26 | China |                                  | 93 cases                                       | 26% asymptomatics                                                                            | 75% family contact                                                                                                              |
| Su L, et al. <sup>12</sup><br>Emerg Microbe Infections | Serie of cases                     | 03/12 | China | -                                | 9 cases from 14 families, ages 11 months to 9y | 6 cases asymptomatics. The rest of children with mild symptoms and recovered after 2-3 weeks | Family transmission. Five discharged children were admitted again because their stool showed positive result in SARS-CoV-2 PCR. |
| Qiu et al <sup>13</sup><br>Lancet Infec Dis            | Serie of cases                     | 03/25 | China | N total= 616                     | 36 cases (6%) in children.                     | Half of them asymptomatics                                                                   | Family contact                                                                                                                  |
| Du W et al. <sup>14</sup><br>Infection                 | Serie of cases (families)          | 03/23 | China | 53 adults                        | 14 children                                    | 8 out of 14 children asymptomatic                                                            | All cases family clusters                                                                                                       |

# BMJ Paediatrics Open

## **The role of children in the transmission of the COVID-19 pandemic: a rapid scoping review**

|                               |                             |
|-------------------------------|-----------------------------|
| Journal:                      | <i>BMJ Paediatrics Open</i> |
| Manuscript ID                 | bmjpo-2020-000722.R1        |
| Article Type:                 | Review                      |
| Date Submitted by the Author: | 02-Jun-2020                 |
| Complete List of Authors:     | Rajmil, Luis                |
| Keywords:                     | Epidemiology, Virology      |
|                               |                             |

SCHOLARONE™  
Manuscripts

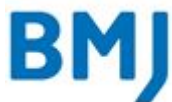

I, the Submitting Author has the right to grant and does grant on behalf of all authors of the Work (as defined in the below author licence), an exclusive licence and/or a non-exclusive licence for contributions from authors who are: i) UK Crown employees; ii) where BMJ has agreed a CC-BY licence shall apply, and/or iii) in accordance with the terms applicable for US Federal Government officers or employees acting as part of their official duties; on a worldwide, perpetual, irrevocable, royalty-free basis to BMJ Publishing Group Ltd ("BMJ") its licensees and where the relevant Journal is co-owned by BMJ to the co-owners of the Journal, to publish the Work in this journal and any other BMJ products and to exploit all rights, as set out in our [licence](#).

The Submitting Author accepts and understands that any supply made under these terms is made by BMJ to the Submitting Author unless you are acting as an employee on behalf of your employer or a postgraduate student of an affiliated institution which is paying any applicable article publishing charge ("APC") for Open Access articles. Where the Submitting Author wishes to make the Work available on an Open Access basis (and intends to pay the relevant APC), the terms of reuse of such Open Access shall be governed by a Creative Commons licence – details of these licences and which [Creative Commons](#) licence will apply to this Work are set out in our licence referred to above.

Other than as permitted in any relevant BMJ Author's Self Archiving Policies, I confirm this Work has not been accepted for publication elsewhere, is not being considered for publication elsewhere and does not duplicate material already published. I confirm all authors consent to publication of this Work and authorise the granting of this licence.

1  
2  
3 Title:

4  
5 **The role of children in the transmission of the COVID-19 pandemic: a rapid scoping review**  
6  
7  
8  
9

10 Author: Luis Rajmil

11  
12 Pediatrician and Epidemiology and Public Health Specialist. Retired  
13  
14

15  
16 Address: Homer 22, 1rst , 1. Barcelona 08023, Spain  
17  
18

19  
20 E-mail: [12455lrr@comb.cat](mailto:12455lrr@comb.cat)  
21  
22  
23  
24  
25

26 **Abstract**

27 As a response to the COVID-19 pandemic most countries adopted measures of social distance,  
28 with childhood population being one of the main focus of attention in these measures. A rapid  
29 scoping review was carried out by searching PubMed to know if children are more contagious  
30 than adults, and the proportion of asymptomatics. Fourteen out of 1099 identified articles  
31 were finally included. Studies included cases from China (N= 9 to 2143), China and Taiwan  
32 (n=536), Korea (n=1), Vietnam (N=1), Australia (N=9), Geneva (N=40), the Netherlands  
33 (N=116); Ireland (N=3); and Spain (population based study of IgG, N=8243). Although no  
34 complete data were available, between 15% and 55-60% were asymptomatic, and 75-100% of  
35 cases were from family transmission. Studies analysing school transmission showed children as  
36 not a driver of transmission. Prevalence of COVID-19 IgG antibody in children <15y was lower  
37 than the general population in the Spanish study. This review suggest that children are not  
38 transmitter to a greater extent than adults, highlight the need for improve the validity of  
39 epidemiologic surveillance to solve current uncertainties, and to take into account social  
40 determinants and child health inequalities during and after the current pandemic.  
41  
42  
43  
44  
45

46 **Keywords:** children, COVID-19; transmission

47 Number of words in the text: 1623

48 Number of words n the abstract: 190

49 References: 32

50 Tables: 1

51 Figures: 1  
52  
53  
54  
55  
56  
57  
58  
59  
60

**What is known about the subject**

- The COVID-19 pandemic has changed the lives of families and children almost everywhere in the world
- Children are susceptible to present infectious symptoms although less severe compared to the elderly, and the general population
- Given the lack of effective treatment, measures taken by Governments in several countries in order implement social distances included school closure, and even in some cases children were closed at home
- These measures, mainly following the precautionary principle, were based on the experiences of previous epidemics (i.e. influenza); nevertheless, many uncertainties exist regarding the role of children in the transmission of the COVID-19

**What this study adds**

- This review suggest that children are not transmitter to a greater extent than adults
- Many of the reported cases in children were from family transmission, and the percentage of asymptomatic children was variable (15%-60%)
- This review highlight the urgent need for improve the validity of epidemiologic surveillance to solve current uncertainties
- Measures taken should balance the potential benefits and avoid other potential adverse effects such as increasing social inequalities in children and families



## Intro

The COVID-19 pandemic started in late 2019 in China has represented a substantial change in the health of the population worldwide, especially for families and children.<sup>1,2</sup> This pandemic and the lack of effective treatment so far until now, highlight the need to take measures to prevent the spread of the infection. Measures adopted at the beginning of the pandemic in almost all countries were based on the available evidence of previous epidemics like influenza, where children were major transmitters of the disease, even more than adults.<sup>3</sup> Nevertheless, it should also be taken into account the data available from the current pandemic given there are several unknown questions. In the current situation measures taken to prevent the spread of the pandemic are generally based on the precautionary principle, and these measures should balance the potential side effects with the infection itself.

In the case of children, data available seems to indicate that they are equally susceptible to presenting infectious symptoms, although less severe compared to the adult population and the elderly.<sup>4</sup> At the moment there are no certainties about the possible causes of this situation. There is also insufficient information on the child population as a source of transmission of the infection. Despite this, in the majority of countries one of the first measures adopted has been the closure of schools and even in some countries, such as Spain, the house confinement of all minors was specifically decided for at least 45 days.<sup>5</sup> These strict measures taken with children present some controversies given that up to date there are many uncertainties regarding these issues in the current COVID-19 pandemic.

Given this situation and the uncertainty on the transmission mechanisms, prediction of severity, the spread of infection in asymptomatic patients, or immunity after infection, a systematic scoping review of the published data was carried out to try to move forward in answering the following questions: are children more contagious than adults? Are they proportionally more asymptomatic?

## Methods

A rapid scoping literature review was carried out by search in PubMed using the following terms: "coronavirus or COVID-19 or SARS-CoV-2" and "neonates or pediatric or infant or children or adolescence" and "transmission" to find reports of pediatric COVID-19. Google Scholar, MedRxiv/bioRxiv and secondary hand search have also been done. The time period was restricted to the last five months, from December the 1st 2019 and updated until 05/28/2020. Available full texts and the reference lists of the relevant studies were reviewed.

### Inclusion/exclusion criteria

All studies published in English, Italian, French or Spanish related to the transmission of COVID-19 in children were included, as well as those who compare the percentage of asymptomatic patients according to age and also the source of contagion when this was possible.

Studies that did not present data on childhood population were excluded, as well as those that focused the data exclusively on the level of severity and / or hospitalizations and / or pediatric intensive care units (PICU), or the treatment. All kind of studies (case series, cohort studies, comments, Editorials, etc.) were included although the emphasis was stated on those descriptive studies of cases. It is not ruled out that there may be some duplication in the cases included. A description of the results obtained was carried out. It was not attempted to rate the quality of included studies in this Review.

## Results

Of the 1099 initial titles, 73 articles were selected for reading the full text. Of these, 14 articles were finally included (Figure 1).

Table 1 shows the results of included studies. Studies reported data from China, Taiwan, Korea, Vietnam, New South Wales (Australia), Geneva (Switzerland); the Netherlands; Ireland, and Spain. Cao et al.<sup>6</sup> found that 2.1% of 44672 confirmed cases were children or adolescents, mainly from intrafamilial clusters. One of the larger series also based on the report of 2143 pediatric cases from China<sup>7</sup> shows that 44% were asymptomatics and the main source of transmission seems to be the family (no data available). It should be taken into account that in the latter case series only 34% of cases of COVID-19 were confirmed and 66% were suspected cases. The first case reported from Korea<sup>8</sup> (10y old) and Vietnam<sup>9</sup> (3 months old) were also associated to family transmission. A study from the hospital of Wuhan addressed to pediatric patients<sup>10</sup> found that 171 out of 1391 screened cases were positive, 15% were asymptomatic cases and 90% of confirmed cases were from family transmission. A systematic review of 9 case series included 93 cases and reported that 26% were asymptomatics, and 75% were from family transmission.<sup>11</sup> Another series of 9 cases from 14 families,<sup>12</sup> 36 cases (out of 616 population),<sup>13</sup> and 14 children (and 53 adults)<sup>14</sup> found that 6, 18, and 8 children were asymptomatics, respectively. All cases in children were from family transmission. In New South Wales schools 9 cases of students of Primary schools and High schools were reported, and one case was detected after 863 contacts analysed.<sup>15</sup> A series of 40 cases out of 4710 at the general population were reported in children younger than 16 years from Geneva, and 8 cases were reported as case index.<sup>16</sup> A study of households in the Netherlands reported data from 116 children 1-16y and preliminary results showed that there are no indications that children younger than 12y were the first in the family infected.<sup>17</sup> In Ireland, no secondary school cases were detected after analysing 125 to 475 contacts of 3 detected cases in students 10-15years old before school closures on 12 March 2020; one case was asymptomatic.<sup>18</sup> Preliminary results of study of COVID-19 IgG prevalence carried out in Spain at the general population level indicate that minors have a lower prevalence of IgG antibodies than adults.<sup>19</sup> In this study the first results show that in children under 1 year the prevalence of IgG was 1.1% (95% confidence interval: 0.3-3.8%), between 1 -4 years= 2.2% (1.4-3.6), 5 to 9 years = 3% (2.3-4.1) and 10-14 years = 3.9% (3.1-4.9), while in the general population the prevalence of IgG was 5% (4.7-5.4).

## Discussion

The results of the present review suggest that children would be asymptomatics as frequently as adults, and that a high percentage of reported cases came from family transmission. Although there are still many uncertainties, it does not appear that children are transmitters to a greater extent than adults. As previously mentioned, the drastic measures taken in the child population in several countries have probably been based on previous epidemics such as influenza,<sup>20</sup> without enough evidence of the current situation. Moreover, there are some theoretical reasons why school closures might be less effective in COVID-19 than in influenza outbreaks. A systematic review found that modelling studies of COVID-19 predict that school closures alone would prevent only 2–4% of deaths, much less than other social distancing interventions.<sup>21</sup>

1  
2  
3 No studies were found on the subject of the present review neither from France, Italy nor the  
4 United States, countries strongly affected by the pandemic. Studies from these countries to  
5 date have been addressed mainly to analyse severity of identified pediatric cases, the need of  
6 PICU, or immune responses in children.<sup>22-24</sup> Nevertheless, the results of this review are likely to  
7 be generalisable including cases from different countries. . Two of the included studies  
8 analysing school contacts found a extremely low level of transmission at school.<sup>15, 18</sup> Moreover,  
9 other very recent published reviews show also the low role of children as a factor of  
10 transmission in general.<sup>25, 26</sup>  
11  
12

13 Other secondary questions that come out from this review are the differences in the  
14 incubation period and the evidence that children (and probably also adults) can excrete the  
15 virus in feces.<sup>6</sup> According to some authors asymptomatic individuals can actively shed the  
16 virus. Further, the incubation period in children following exposure to the virus can range  
17 upward of 24 days.<sup>27</sup> Children more often have gastrointestinal symptoms compared with  
18 adults. The majority of children infected by novel CoVID-19s have a documented household  
19 contact, often showing symptoms before them.<sup>4</sup>  
20  
21  
22

23 If children are important in viral transmission and amplification, social and public health  
24 policies (eg, avoiding interaction with elderly people) could be established to slow transmission  
25 and protect vulnerable populations. Nevertheless, the application of the precautionary  
26 principle should be evidence-based as much as possible and try to avoid creating adverse  
27 effects with potential medium and long-term negative impact on the childhood population. A  
28 study analysing viral load by age in a sample of 3712 patients from Berlin found no differences  
29 by age on viral loads; even in the very young patients do not differ significantly from those of  
30 adults.<sup>28</sup>  
31  
32

33 Several limitations of the present rapid scoping review should be mentioned. The inclusion of  
34 none reviewed pre-print papers, the inclusion criteria based only on one evaluation, the lack of  
35 critical analysis of the risk of bias, and the inclusion of non-primary study designs may weakens  
36 the attempts at understanding the data existing. However, the urgent need to understand the  
37 process of transmission and the results obtained provide a reasonable evidence on the process  
38 analysed. Furthermore, the results of other reviews on the process of infection in children with  
39 similar results to the present study support the strength of the results obtained. Secondly, the  
40 current lack of reliable, valid and comparable data on epidemiologic surveillance,<sup>29</sup> on the  
41 diagnostic tests, and the scarce knowledge on the mechanism of transmission and  
42 prognostic.<sup>30, 31</sup> High quality epidemiological studies are necessary to solve these questions  
43 with certain plausibility. On the other hand, up to date there are scarce data on the  
44 socioeconomic factors and its influence on the current pandemic. Social determinants of child  
45 health should be addressed to enhance the positive effects and avoid the adverse effects of  
46 this pandemic on children's rights and social inequalities in children's health.<sup>32</sup>  
47  
48  
49  
50  
51  
52  
53  
54  
55  
56  
57  
58  
59  
60

## References

1. Pandemic school closures: risks and opportunities (Ed). *Lancet Child Adolesc Health* 2020; [https://doi.org/10.1016/S2352-4642\(20\)30105-X](https://doi.org/10.1016/S2352-4642(20)30105-X)
2. Cluver L, Lachman JM, Sherr L, Wessels I, Krug E, Rakotomalala S, et al. Parenting in time of COVID-19. *Lancet* 2020; 395: [https://doi.org/10.1016/S0140-6736\(20\)30736-4](https://doi.org/10.1016/S0140-6736(20)30736-4).
3. Heikkinen T. Influenza in children. *Acta Pædiatrica* 2006; 95: 778-784.
4. Kelvin AA, Halperin S. COVID-19 in children: the link in the transmission chain. *Lancet Infect Dis*. 2020. doi: 10.1016/S1473-3099(20)30236-X [Epub ahead of print]
5. Spanish Ministry of Health. *Buenas prácticas en las salidas de la población infantil*. (Accessed April 27). [https://www.mscbs.gob.es/profesionales/saludPublica/ccayes/alertasActual/nCov-China/documentos/GUIA\\_DE\\_BUENAS\\_PRACTICAS\\_EN\\_LAS\\_SALIDAS\\_DE\\_LA\\_POBLACION\\_IN FANTIL\\_DURANTE\\_EL\\_ESTADO\\_DE\\_ALARMA.pdf](https://www.mscbs.gob.es/profesionales/saludPublica/ccayes/alertasActual/nCov-China/documentos/GUIA_DE_BUENAS_PRACTICAS_EN_LAS_SALIDAS_DE_LA_POBLACION_IN FANTIL_DURANTE_EL_ESTADO_DE_ALARMA.pdf).
6. Cao Q, Chen YCh, Chen ChL, Chiu Ch. SARS-CoV-2 infection in children: Transmission dynamics and clinical characteristics. *J Formos Med Assoc* 2020; 119(3): 670–673.
7. Dong Y, Mo X, Hu Y, Xin Qi, Jiang F, Jiang Z, et al. Epidemiological characteristics of 2143 pediatric patients with 2019 coronavirus disease in China. *Pediatrics* 2020; doi: 10.1542/peds.2020-0702.
8. Park JY, Han MS, Park KU, Kim JY, Choi EH. First Pediatric Case of Coronavirus Disease 2019 in Korea. *J Korean Med Sci* 2020 Mar 23; 35(11): e124. doi: 10.3346/jkms.2020.35.e124.
9. Le HT, Nguyen LV, Tran DM, Do HT, Tran HT, Le YT, et al. The first infant case of COVID-19 acquired from a secondary transmission in Vietnam. *Lancet Child Adolesc Health* 2020 doi: 10.1016/S2352-4642(20)30091-2 [Epub ahead of print].
10. Lu X, Zhang L, Du H, Zhang J, Li YY, Qu J, et al. SARS-CoV-2 Infection in Children. *N Engl J Med* 2020. doi: 10.1056/NEJMc2005073.
11. Chang TH, Wu JL, Chang LY. Clinical characteristics and diagnostic challenges of pediatric COVID-19: A systematic review and meta-analysis. *J Formosan Med Assoc* 2020; <https://doi.org/10.1016/j.jfma.2020.04.007>.
12. Su L, Ma X, Yu H, Zhang Z, Bian P, Han Y, et al. The different clinical characteristics of corona virus disease cases between children and their families in China – the character of children with COVID-19. *Emerg Microbes Infect* 2020; 9(1): 707–713. doi: 10.1080/22221751.2020.1744483.

- 1  
2  
3 13. Qiu H, Wu J, Hong L, Luo Y, Song Q, Chen D. Clinical and epidemiological features of 36  
4 children with coronavirus disease 2019 (COVID-19) in Zhejiang, China: an observational cohort  
5 study. *Lancet Infect Dis* 2020. doi: 10.1016/S1473-3099(20)30198-5 [Epub ahead of print]  
6  
7  
8 14. Du W, Yu J, Wang H, Zhang X, Zhang S, Li Q, et al. Clinical characteristics of COVID-19 in  
9 children compared with adults in Shandong Province, China. *Infection* 2020: 1–8. doi:  
10 10.1007/s15010-020-01427-2 [Epub ahead of print].  
11  
12  
13 15. National Centre for immunization research and surveillance. COVID-19 in schools—the  
14 experience in NSW; 2020. [http://ncirs.org.au/sites/default/files/2020-](http://ncirs.org.au/sites/default/files/2020-04/NCIRS%20NSW%20Schools%20COVID_Summary_FINAL%20public_26%20April%202020.pdf)  
15 [04/NCIRS%20NSW%20Schools%20COVID\\_Summary\\_FINAL%20public\\_26%20April%202020.pdf](http://ncirs.org.au/sites/default/files/2020-04/NCIRS%20NSW%20Schools%20COVID_Summary_FINAL%20public_26%20April%202020.pdf)  
16  
17  
18  
19 16. Posfay-Barbe KM, Wagner N, Gauthey M, et al. COVID-19 in children and the  
20 dynamics of infection in families. *Pediatrics*. 2020; doi: 10.1542/peds.2020-1576  
21  
22  
23 17. National Institute for Public Health and the Environment. Ministry of Health, Welfare and  
24 Sport. Netherlands. Children and COVID-19. Accessed 05/27/2020:  
25 <https://www.rivm.nl/en/novel-coronavirus-covid-19/children-and-covid-19>  
26  
27  
28  
29 18. Heavey L , Casey G , Kelly C , Kelly D , McDarby G . No evidence of secondary transmission  
30 of COVID-19 from children attending school in Ireland, 2020. *Euro Surveill*.  
31 2020;25(21):pii=2000903. <https://doi.org/10.2807/1560-7917.ES.2020.25.21.2000903>  
32  
33  
34 19. Carlos III Public Health Institute. Ministerio de Sanidad. Estudio ENE-COVID19: primera  
35 ronda. Estudio Nacional de sero-epidemiología. Informe preliminar 13/05/2020.  
36 [https://www.ciencia.gob.es/stfls/MICINN/Ministerio/FICHEROS/ENECOVID\\_Informe\\_prelimina](https://www.ciencia.gob.es/stfls/MICINN/Ministerio/FICHEROS/ENECOVID_Informe_preliminar_cierre_primera_ronda_13Mayo2020.pdf)  
37 [r\\_cierre\\_primera\\_ronda\\_13Mayo2020.pdf](https://www.ciencia.gob.es/stfls/MICINN/Ministerio/FICHEROS/ENECOVID_Informe_preliminar_cierre_primera_ronda_13Mayo2020.pdf)  
38  
39  
40 20. Wallinga J, Teunis P, Kretzschmar M. Using data on social contacts to estimate age-specific  
41 transmission parameters for respiratory spread infectious agents. *Am J Epidemiol* 2006; 164:  
42 936–44.  
43  
44  
45 21. Viner RM, Russell SJ, Croker H, Packer J, Ward J, Stansfield C, et al. School closure and  
46 management practices during coronavirus outbreaks including COVID-19: a rapid systematic  
47 review. *Lancet Child Adolesc Health* 2020; 4: 397–404.  
48  
49  
50 22. Cristiani L, Mancino E, Matera L, Nenna R, Pierangeli A, Scagnolari A, et al. Will children  
51 reveal their secret? The coronavirus dilemma. *Eur Respir J* 2020: 2000749. doi:  
52 10.1183/13993003.00749-2020 [Epub ahead of print].  
53  
54  
55  
56  
57  
58  
59  
60

- 1  
2  
3 23. Pathak B, Salemi JL, Sobers N, Menard J, Hambleton IR. Intensive care admission in the US  
4 and modeling the number of PICU needed for children. *J Public Health Manag Pract* 2020; doi:  
5 10.1097/PHH.0000000000001190.  
6  
7  
8 24. Bialek S, Gierke R, Hughes M, McNamara LA, Pilishvili T, Skoff T. Coronavirus Disease 2019  
9 in Children — United States. CDC COVID-19 Response Team, CDC COVID-19 Response Team.  
10 *MMWR Morb Mortal Wkly Rep* 2020; 69(14): 422–426. doi: 10.15585/mmwr.mm6914e4  
11  
12  
13 25. Ludvigsson JF. Children are unlikely to be the main drivers of the COVID-19 pandemic  
14 *Acta Paediatr* 2020; doi:10.1111/APA.15371  
15  
16  
17 26. Fretheim A. The role of children in the transmission of SARS-CoV-2-19 – a rapid review  
18 [Barns rolle i spredning av SARS-CoV-19 (Covid-19) – en hurtigoversikt] Rapid review, 2020.  
19 Oslo: Folkehelseinstituttet/Norwegian Institute of Public Health; 2020.  
20  
21  
22 27. Yonker LM, Shen K, Kinane TB. Lessons unfolding from pediatric cases of COVID-19 disease  
23 caused by SARS-CoV-2 infection. *Pediatric Pulmonol* 2020; 55:1085–1086.  
24  
25  
26 28. Jones TC, Mühlemann B, Veith T, Zuchowski M, Hofmann J, Stein A, et al. An analysis of  
27 SARS-CoV-2 viral load by patient age.  
28 [https://zoonosen.charite.de/fileadmin/user\\_upload/microsites/m\\_cc05/virologie-  
29 ccm/dateien\\_upload/Weitere\\_Dateien/analysis-of-SARS-CoV-2-viral-load-by-patient-age.pdf](https://zoonosen.charite.de/fileadmin/user_upload/microsites/m_cc05/virologie-ccm/dateien_upload/Weitere_Dateien/analysis-of-SARS-CoV-2-viral-load-by-patient-age.pdf)  
30  
31  
32 29. Pearce N, Vandenbroucke JP, VanderWeele TJ, Greenland S. Accurate Statistics on COVID-  
33 19 Are Essential for Policy Guidance and Decisions. *Am J Public Health* 2020;e1-e3. doi:  
34 10.2105/AJPH.2020.305708.  
35  
36  
37 30. Zimmermann P, Curtis N. Coronavirus Infections in Children Including COVID-19: An  
38 Overview of the Epidemiology, Clinical Features, Diagnosis, Treatment and Prevention Options  
39 in Children. *Pediatr Infect Dis J* 2020; 39(5): 355–368. doi: 10.1097/INF.0000000000002660  
40  
41  
42 31. Hasan A, Mehmood N, Fergie J. Coronavirus Disease (COVID-19) and Pediatric Patients: A  
43 Review of Epidemiology, Symptomatology, Laboratory and Imaging Results to Guide the  
44 Development of a Management Algorithm. *Cureus* 2020; 12(3): e7485. DOI  
45 10.7759/cureus.7485.  
46  
47  
48 32. Goldhagen JL, Shenoda S, Oberg C, Mercer R, Kadir A, Raman S, et al. Rights, justice, and  
49 equity: a global agenda for child health and wellbeing. *Lancet Child Adolesc Health* 2019;  
50 [https://doi.org/10.1016/S2352-4642\(19\)30346-3](https://doi.org/10.1016/S2352-4642(19)30346-3).  
51  
52  
53  
54  
55  
56  
57  
58  
59  
60

**Table 1. Characteristics of included studies and main results**

| First author / Journal                                      | Type of study                    | Publication date | Country                                                                            | N total population               | Number of pediatric cases                                                                       | Asymptomatics                                            | Source of transmission / Observations                                                                                                                |
|-------------------------------------------------------------|----------------------------------|------------------|------------------------------------------------------------------------------------|----------------------------------|-------------------------------------------------------------------------------------------------|----------------------------------------------------------|------------------------------------------------------------------------------------------------------------------------------------------------------|
| Cao et al. <sup>6</sup><br>J Formosan Med Assoc             | Review of reported cases         | 02/26            | China / Taiwan                                                                     | 44672 laboratory confirmed cases | Number of reported cases comparing with adult population was 0.9% for <10y, and 1.2% for 10-20y | Most showed mild symptoms. No data on asymptomatic cases | Mainly intra-familial cluster circles. Children could become the main spreader when their infection is mild /Stool could be a source of transmission |
| Dong et al. <sup>7</sup><br>Pediatrics                      | Epidemiology of pediatrics cases | 03/17            | China/<br>Cases recruited from the China Center for Disease Control and prevention | -                                | 2143 pediatric cases reported; 34% onfirmed; 66% suspected                                      | 44% asymptomatics                                        | Not confirmed but family transmission seems to be the main source of cases                                                                           |
| Ji Young Park et al. <sup>8</sup><br>J Korean Med Sci       | A case study. Brief report       | 03/16            | Korea                                                                              | -                                | A 10y old girl. 1rst case detected in Korea                                                     | Mild symptoms                                            | Close contact of her uncle and mother who were confirmed                                                                                             |
| Hai T Le et al. <sup>9</sup><br>Lancet Child Adolesc Health | A case -study                    | 03/23            | Vietnam                                                                            | -                                | 3 months old girl. 1rst case of infant detected in Vietnam                                      | Nasopharyngeal swabs positive                            | Contact with her grandmother who was confirmed                                                                                                       |
| Lu X et al. <sup>10</sup>                                   | Correspondence. Serie of cases   | 03/18            | China                                                                              | Children treated                 | 171/1391 tested were (+).                                                                       | 15% asymptomatic. Three patients                         | 90% confirmed family cluster                                                                                                                         |

|                                                        |                                                |       |             |                                                                     |                                                               |                                                                                              |                                                                                                                                 |
|--------------------------------------------------------|------------------------------------------------|-------|-------------|---------------------------------------------------------------------|---------------------------------------------------------------|----------------------------------------------------------------------------------------------|---------------------------------------------------------------------------------------------------------------------------------|
| New England J Med                                      |                                                |       |             | at the Wuhan Children's Hospital                                    |                                                               | required PICU (all with previous chronic conditions)                                         |                                                                                                                                 |
| Chang et al. <sup>11</sup><br>J Formosan Med Assoc     | Systematic review of 9 case series             | 02/26 | China       |                                                                     | 93 cases                                                      | 26% asymptomatics                                                                            | 75% family contact                                                                                                              |
| Su L, et al. <sup>12</sup><br>Emerg Microbe Infections | Serie of cases                                 | 03/12 | China       | -                                                                   | 9 cases from 14 families, ages 11 months to 9y                | 6 cases asymptomatics. The rest of children with mild symptoms and recovered after 2-3 weeks | Family transmission. Five discharged children were admitted again because their stool showed positive result in SARS-CoV-2 PCR. |
| Qiu et al. <sup>13</sup><br>Lancet Infect Dis          | Serie of cases                                 | 03/25 | China       | N total= 616                                                        | 36 cases (6%) in children.                                    | Half of them asymptomatics                                                                   | Family contact                                                                                                                  |
| Du W et al. <sup>14</sup><br>Infection                 | Serie of cases (families)                      | 03/23 | China       | 53 adults                                                           | 14 children                                                   | 8 out of 14 children asymptomatic                                                            | All cases family clusters                                                                                                       |
| NCIRS <sup>15</sup>                                    | Reported cases from New South Wales schools.   | 04/26 | Australia   | 18 cases (9 staff school members and 9 students) during March-April | 9 cases of students from 10 high schools and 5 primary school | No data                                                                                      | 863 analysed contacts of students: 1 case detected                                                                              |
| Posfay-Barbe et al. <sup>16</sup><br>Pediatrics        | Serie of cases from Geneva University Hospital | 05/27 | Switzerland | 4710 total cases. Familial cluster evaluation                       | 40 cases (0.9%) <16y                                          | 1 asymptomatic                                                                               | 8% (n=3) developed symptoms before other family members                                                                         |



|                                                  |                                                          |       |             |                                                                                                                 |                                                      |                                                    |                                                                                                                                                                                                        |
|--------------------------------------------------|----------------------------------------------------------|-------|-------------|-----------------------------------------------------------------------------------------------------------------|------------------------------------------------------|----------------------------------------------------|--------------------------------------------------------------------------------------------------------------------------------------------------------------------------------------------------------|
| RIVM <sup>17</sup>                               | National Institute for Public Health and the Environment | 05/27 | Netherlands | Study in households: 239 participants, including 185 housemates. This involves 123 adults                       | 116 children between 1 -16 years.                    | No data                                            | There are no indications that children younger than 12 years old were the first in the family to be infected.                                                                                          |
| Heavey L, et al. <sup>18</sup> Euro Surveill     | National Public Health Emergency                         | 05/28 | Ireland     | Study of school contacts of 3 cases on children 10-15y before 03/12/2020                                        | 125; 222; 475 school contacts analysed, respectively | One case asymptomatic                              | No secondary school cases detected                                                                                                                                                                     |
| Carlos III Public Health Institute <sup>19</sup> | ENE-COVID-19 study: first wave                           | 05/13 | Spain       | Study of IgG antibody in a representative sample of Spanish population (N total participant population = 60897) | 8243 children <15y.                                  | No data on available on symptoms stratified by age | Prevalence of IgG:<br><1 year = 1.1% (95% confidence interval: 0.3-3.8%)/ 1 -4 years= 2.2% (1.4-3.6) / 5 -9 years = 3% (2.3-4.1)/ 10-14 years = 3.9% (3.1-4 , 9)<br>General population = 5% (4.7-5.4). |

NCIRS: National Centre for immunization research and surveillance, New South Wales; RIVM: National Institute for Public Health and the Environment, the Netherlands

1  
2  
3  
4  
5  
6  
7  
8  
9  
10  
11  
12  
13  
14  
15  
16  
17  
18  
19  
20  
21  
22  
23  
24  
25  
26  
27  
28  
29  
30  
31  
32  
33  
34  
35  
36  
37  
38  
39  
40  
41  
42  
43  
44  
45  
46  
47  
48  
49  
50  
51  
52  
53  
54  
55  
56  
57  
58  
59  
60

Figure 1. Search flow.

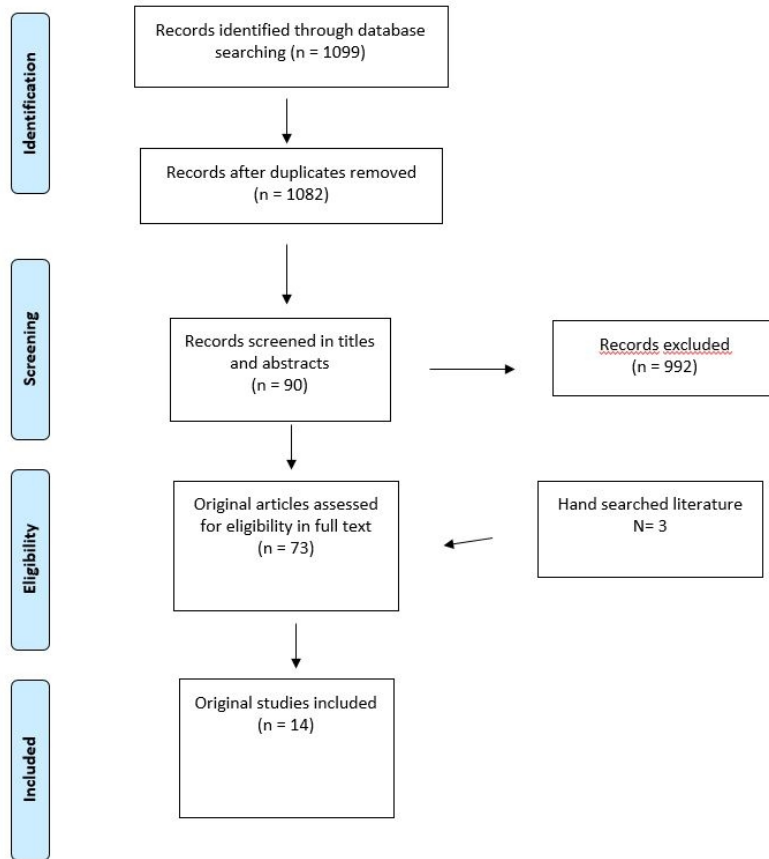

229x205mm (96 x 96 DPI)

# BMJ Paediatrics Open

## **The role of children in the transmission of the COVID-19 pandemic: a rapid scoping review**

|                               |                             |
|-------------------------------|-----------------------------|
| Journal:                      | <i>BMJ Paediatrics Open</i> |
| Manuscript ID                 | bmjpo-2020-000722.R2        |
| Article Type:                 | Review                      |
| Date Submitted by the Author: | 10-Jun-2020                 |
| Complete List of Authors:     | Rajmil, Luis                |
| Keywords:                     | Epidemiology, Virology      |
|                               |                             |

SCHOLARONE™  
Manuscripts



I, the Submitting Author has the right to grant and does grant on behalf of all authors of the Work (as defined in the below author licence), an exclusive licence and/or a non-exclusive licence for contributions from authors who are: i) UK Crown employees; ii) where BMJ has agreed a CC-BY licence shall apply, and/or iii) in accordance with the terms applicable for US Federal Government officers or employees acting as part of their official duties; on a worldwide, perpetual, irrevocable, royalty-free basis to BMJ Publishing Group Ltd ("BMJ") its licensees and where the relevant Journal is co-owned by BMJ to the co-owners of the Journal, to publish the Work in this journal and any other BMJ products and to exploit all rights, as set out in our [licence](#).

The Submitting Author accepts and understands that any supply made under these terms is made by BMJ to the Submitting Author unless you are acting as an employee on behalf of your employer or a postgraduate student of an affiliated institution which is paying any applicable article publishing charge ("APC") for Open Access articles. Where the Submitting Author wishes to make the Work available on an Open Access basis (and intends to pay the relevant APC), the terms of reuse of such Open Access shall be governed by a Creative Commons licence – details of these licences and which [Creative Commons](#) licence will apply to this Work are set out in our licence referred to above.

Other than as permitted in any relevant BMJ Author's Self Archiving Policies, I confirm this Work has not been accepted for publication elsewhere, is not being considered for publication elsewhere and does not duplicate material already published. I confirm all authors consent to publication of this Work and authorise the granting of this licence.

1  
2  
3 Title:

4 **The role of children in the transmission of the COVID-19 pandemic: a rapid scoping review**  
5  
6  
7  
8  
9

10 Author: Luis Rajmil

11  
12 Pediatrician and Epidemiology and Public Health Specialist. Retired  
13  
14

15  
16 Address: Homer 22, 1rst , 1. Barcelona 08023, Spain  
17  
18

19  
20 E-mail: [12455lrr@comb.cat](mailto:12455lrr@comb.cat)  
21  
22  
23  
24  
25

26 **Abstract**

27 **Background** As a response to the COVID-19 pandemic most countries have adopted measures  
28 of social distance, with the childhood population being one of the main focus of attention in  
29 these measures.  
30

31 **Methods** A rapid scoping review was carried out by searching PubMed to know if children are  
32 more contagious than adults, and the proportion of asymptomatic cases in children. Google  
33 Scholar, and MedRxiv/bioRxiv were also searched. The time period was restricted from 1  
34 December 2019 until 28 May 2020. Only studies published in English, Italian, French or  
35 Spanish were included.  
36  
37

38 **Results** Fourteen out of 1099 identified articles were finally included. Studies included cases  
39 from China (N= 9 to 2143), China and Taiwan (n=536), Korea (n=1), Vietnam (N=1), Australia  
40 (N=9), Geneva (N=40), the Netherlands (N=116); Ireland (N=3); and Spain (population based  
41 study of IgG, N=8243). Although no complete data were available, between 15% and 55-60%  
42 were asymptomatic, and 75-100% of cases were from family transmission. Studies analysing  
43 school transmission showed children as not a driver of transmission. Prevalence of COVID-19  
44 IgG antibody in children <15y was lower than the general population in the Spanish study.  
45  
46

47 **Conclusions** Children are not transmitters to a greater extent than adults. There is a need to  
48 improve the validity of epidemiologic surveillance to solve current uncertainties, and to take  
49 into account social determinants and child health inequalities during and after the current  
50 pandemic.  
51  
52  
53

54 **Keywords:** children, COVID-19; transmission

55 Number of words in the text: 1628

56 Number of words in the abstract: 225

57 References: 32

58 Tables: 1

59 Figures: 1  
60

**What is known about the subject**

- The COVID-19 pandemic has changed the lives of families and children almost everywhere in the world
- Children are susceptible to COVID-19 although clinically they are present with milder symptoms compared to the elderly, and the general population
- Given the lack of effective treatment, measures taken by Governments in several countries in order implement social distances included school closure, and even in some cases children were confined to the home
- These measures, mainly following the precautionary principle, were based on the experiences of previous epidemics (i.e. influenza) where children were the main transmitters

**What this study adds**

- Children are not transmitters to a greater extent than adults
- Many of the reported cases in children were from family transmission, and the percentage of asymptomatic children was variable (15%-60%)
- The urgent need for improve the validity of epidemiologic surveillance to solve current uncertainties
- Measures taken should balance the potential benefits and avoid other potential adverse effects such as increasing social inequalities in children and families

## Intro

The COVID-19 pandemic started in late 2019 in China has represented a substantial change in the health of the population worldwide, especially for families and children.<sup>1,2</sup> This pandemic and the lack of effective treatment so far until now, highlight the need to take measures to prevent the spread of the infection. Measures adopted at the beginning of the pandemic in almost all countries were based on the available evidence of previous epidemics like influenza, where children were major transmitters of the disease, even more than adults.<sup>3</sup> Nevertheless, it should also be taken into account the data available from the current pandemic given there are several unknown questions. In the current situation measures taken to prevent the spread of the pandemic are generally based on the precautionary principle, and these measures should balance the potential side effects with the infection itself.

In the case of children, data available seems to indicate that they are equally susceptible to presenting infectious symptoms, although less severe compared to the adult population and the elderly.<sup>4</sup> At the moment there are no certainties about the possible causes of this situation. There is also insufficient information on the child population as a source of transmission of the infection. Despite this, in the majority of countries one of the first measures adopted has been the closure of schools and even in some countries, such as Spain, the house confinement of all minors was specifically decided for at least 45 days.<sup>5</sup> These strict measures taken with children present some controversies given that up to date there are many uncertainties regarding these issues in the current COVID-19 pandemic.

Given this situation and the uncertainty on the transmission mechanisms, prediction of severity, the spread of infection in asymptomatic patients, or immunity after infection, a systematic scoping review of the published data was carried out to try to move forward in answering the following questions: are children more contagious than adults? Are they proportionally more asymptomatic?

## Methods

A rapid scoping literature review was carried out by search in PubMed using the following terms: "coronavirus or COVID-19 or SARS-CoV-2" and "neonates or pediatric or infant or children or adolescence" and "transmission" to find reports of pediatric COVID-19. Google Scholar, MedRxiv/bioRxiv and secondary hand search have also been done. The time period was restricted to the last six months, from December the 1st 2019 and updated until 28 May 2020. Available full texts and the reference lists of the relevant studies were reviewed.

### Inclusion/exclusion criteria

All studies published in English, Italian, French or Spanish related to the transmission of COVID-19 in children were included, as well as those comparing the percentage of asymptomatic patients according to age and also the source of contagion when this was possible.

Studies that did not present data on childhood population were excluded, as well as those that focused the data exclusively on the level of severity and / or hospitalizations and / or pediatric intensive care units (PICU), or the treatment. All kind of studies (case series, cohort studies, comments, Editorials, etc.) were included although the emphasis was stated on those descriptive studies of cases. It is not ruled out that there may be some duplication in the cases included. A description of the results obtained was carried out. It was not attempted to rate the quality of included studies in this Review.

## Results

Of the 1099 initial titles, 73 articles were selected for reading the full text. Of these, 14 articles were finally included (Figure 1).

Table 1 shows the results of included studies. Studies reported data from China, Taiwan, Korea, Vietnam, New South Wales (Australia), Geneva (Switzerland); the Netherlands; Ireland, and Spain. Cao et al.<sup>6</sup> found that 2.1% of 44672 confirmed cases were children or adolescents, mainly from intrafamilial clusters. One of the larger series also based on the report of 2143 pediatric cases from China<sup>7</sup> shows that 44% were asymptomatics and the main source of transmission seems to be the family (no data available). It should be taken into account that in the latter case series only 34% of cases of COVID-19 were confirmed and 66% were suspected cases.

The first case reported from Korea<sup>8</sup> (10y old) and Vietnam<sup>9</sup> (3 months old) were also associated with family transmission. A study from the hospital of Wuhan addressed to pediatric patients<sup>10</sup> found that 171 out of 1391 screened cases were positive, 15% were asymptomatic cases and 90% of confirmed cases were from family transmission. A systematic review of 9 case series included 93 cases and reported that 26% were asymptomatics, and 75% were from family transmission.<sup>11</sup> Another series of 9 cases from 14 families,<sup>12</sup> 36 cases (out of 616 population),<sup>13</sup> and 14 children (and 53 adults)<sup>14</sup> found that 6, 18, and 8 children were asymptomatics, respectively.

All cases in children were from family transmission. In New South Wales schools, 9 cases of students of Primary schools and High schools were reported, and one case was detected after 863 contacts analysed.<sup>15</sup> A series of 40 cases out of 4710 at the general population were reported in children younger than 16 years from Geneva, and 8 cases were reported as case index.<sup>16</sup>

A study of households in the Netherlands reported data from 116 children 1-16y and preliminary results showed that there are no indications that children younger than 12y were the first in the family infected.<sup>17</sup> In Ireland, no secondary school cases were detected after analysing 125 to 475 contacts of 3 detected cases in students 10-15years old before school closures on 12 March 2020; one case was asymptomatic.<sup>18</sup> Preliminary results of study of COVID-19 IgG prevalence carried out in Spain at the general population level indicate that minors have a lower prevalence of IgG antibodies than adults.<sup>19</sup> In this study the first results show that in children under 1 year the prevalence of IgG was 1.1% (95% confidence interval: 0.3-3.8%), between 1 -4 years= 2.2% (1.4-3.6), 5 to 9 years = 3% (2.3-4.1) and 10-14 years = 3.9% (3.1-4.9), while in the general population the prevalence of IgG was 5% (4.7-5.4).

## Discussion

The results of the present review suggest that children are as likely to be asymptomatic cases as frequently as adults, and that a high percentage of reported cases came from family transmission. Although there are still many uncertainties, it does not appear that children are transmitters to a greater extent than adults. As previously mentioned, the drastic measures taken in the child population in several countries have probably been based on previous



1  
2  
3 epidemics such as influenza,<sup>20</sup> without enough evidence of the current situation. Moreover,  
4 there are some theoretical reasons why school closures may be less effective in COVID-19 than  
5 in influenza outbreaks. A systematic review found that modelling studies of COVID-19 predict  
6 that school closures alone would prevent only 2–4% of deaths. This is much less than other  
7 social distancing interventions.<sup>21</sup>  
8  
9

10 No studies were found on the subject of the present review from France, Italy or the United  
11 States, countries strongly affected by the pandemic. Studies from these countries to date have  
12 been addressed mainly to analyse severity of identified pediatric cases, the need of PICU, or  
13 immune responses in children.<sup>22-24</sup> Nevertheless, the results of this review are likely to be  
14 generalisable including cases from different countries. . Two of the included studies analysing  
15 school contacts found a extremely low level of transmission at school.<sup>15, 18</sup> Moreover, other  
16 very recent published reviews show also the low role of children as a factor of transmission in  
17 general.<sup>25, 26</sup>  
18  
19

20 Other secondary questions that come out from this review are the differences in the  
21 incubation period and the evidence that children (and probably also adults) can excrete the  
22 virus in feces.<sup>6</sup> According to some authors asymptomatic individuals can actively shed the  
23 virus. Further, the incubation period in children following exposure to the virus can range  
24 upward of 24 days.<sup>27</sup> Children more often have gastrointestinal symptoms compared with  
25 adults. The majority of children infected by novel CoVID-19s have a documented household  
26 contact, often showing symptoms before them.<sup>4</sup>  
27  
28

29 If children are important in viral transmission and amplification, social and public health  
30 policies (eg, avoiding interaction with elderly people) could be established to slow transmission  
31 and protect vulnerable populations. Nevertheless, the application of the precautionary  
32 principle should be evidence-based as much as possible and try to avoid creating adverse  
33 effects with potential medium and long-term negative impact on the childhood population. A  
34 study analysing viral load by age in a sample of 3712 patients from Berlin found no differences  
35 by age on viral loads; even in the very young patients do not differ significantly from those of  
36 adults.<sup>28</sup>  
37  
38

39 Several limitations of the present rapid scoping review should be mentioned. The inclusion of  
40 none reviewed pre-print papers, the inclusion criteria based only on one evaluation, the lack of  
41 critical analysis of the risk of bias, and the inclusion of non-primary study designs may weaken  
42 the attempts at understanding the data . However, the urgent need to understand the process  
43 of transmission and the results obtained provide a reasonable evidence on the process  
44 analysed. Furthermore, the results of other reviews on the process of infection in children with  
45 similar results to the present study support the strength of the results obtained. Secondly, the  
46 current lack of reliable, valid and comparable data on epidemiologic surveillance,<sup>29</sup> on the  
47 diagnostic tests, and the scarce knowledge on the mechanism of transmission and  
48 prognostic.<sup>30, 31</sup> High quality epidemiological studies are necessary to solve these questions  
49 with certain plausibility. On the other hand, up to date there are scarce data on the  
50 socioeconomic factors and its influence on the current pandemic. Social determinants of child  
51 health should be addressed to enhance the positive effects and avoid the adverse effects of  
52 this pandemic on children's rights and social inequalities in children's health.<sup>32</sup>  
53  
54  
55  
56  
57  
58  
59  
60

## References

1. Pandemic school closures: risks and opportunities (Ed). *Lancet Child Adolesc Health* 2020; [https://doi.org/10.1016/S2352-4642\(20\)30105-X](https://doi.org/10.1016/S2352-4642(20)30105-X)
2. Cluver L, Lachman JM, Sherr L, Wessels I, Krug E, Rakotomalala S, et al. Parenting in time of COVID-19. *Lancet* 2020; 395: [https://doi.org/10.1016/S0140-6736\(20\)30736-4](https://doi.org/10.1016/S0140-6736(20)30736-4).
3. Heikkinen T. Influenza in children. *Acta Pædiatrica* 2006; 95: 778-784.
4. Kelvin AA, Halperin S. COVID-19 in children: the link in the transmission chain. *Lancet Infect Dis*. 2020. doi: 10.1016/S1473-3099(20)30236-X [Epub ahead of print]
5. Spanish Ministry of Health. *Buenas prácticas en las salidas de la población infantil*. (Accessed April 27). [https://www.mscbs.gob.es/profesionales/saludPublica/ccayes/alertasActual/nCov-China/documentos/GUIA\\_DE\\_BUENAS\\_PRACTICAS\\_EN\\_LAS\\_SALIDAS\\_DE\\_LA\\_POBLACION\\_IN FANTIL\\_DURANTE\\_EL\\_ESTADO\\_DE\\_ALARMA.pdf](https://www.mscbs.gob.es/profesionales/saludPublica/ccayes/alertasActual/nCov-China/documentos/GUIA_DE_BUENAS_PRACTICAS_EN_LAS_SALIDAS_DE_LA_POBLACION_IN FANTIL_DURANTE_EL_ESTADO_DE_ALARMA.pdf).
6. Cao Q, Chen YCh, Chen ChL, Chiu Ch. SARS-CoV-2 infection in children: Transmission dynamics and clinical characteristics. *J Formos Med Assoc* 2020; 119(3): 670–673.
7. Dong Y, Mo X, Hu Y, Xin Qi, Jiang F, Jiang Z, et al. Epidemiological characteristics of 2143 pediatric patients with 2019 coronavirus disease in China. *Pediatrics* 2020; doi: 10.1542/peds.2020-0702.
8. Park JY, Han MS, Park KU, Kim JY, Choi EH. First Pediatric Case of Coronavirus Disease 2019 in Korea. *J Korean Med Sci* 2020 Mar 23; 35(11): e124. doi: 10.3346/jkms.2020.35.e124.
9. Le HT, Nguyen LV, Tran DM, Do HT, Tran HT, Le YT, et al. The first infant case of COVID-19 acquired from a secondary transmission in Vietnam. *Lancet Child Adolesc Health* 2020 doi: 10.1016/S2352-4642(20)30091-2 [Epub ahead of print].
10. Lu X, Zhang L, Du H, Zhang J, Li YY, Qu J, et al. SARS-CoV-2 Infection in Children. *N Engl J Med* 2020. doi: 10.1056/NEJMc2005073.
11. Chang TH, Wu JL, Chang LY. Clinical characteristics and diagnostic challenges of pediatric COVID-19: A systematic review and meta-analysis. *J Formosan Med Assoc* 2020; <https://doi.org/10.1016/j.jfma.2020.04.007>.
12. Su L, Ma X, Yu H, Zhang Z, Bian P, Han Y, et al. The different clinical characteristics of corona virus disease cases between children and their families in China – the character of children with COVID-19. *Emerg Microbes Infect* 2020; 9(1): 707–713. doi: 10.1080/22221751.2020.1744483.

- 1  
2  
3 13. Qiu H, Wu J, Hong L, Luo Y, Song Q, Chen D. Clinical and epidemiological features of 36  
4 children with coronavirus disease 2019 (COVID-19) in Zhejiang, China: an observational cohort  
5 study. *Lancet Infect Dis* 2020. doi: 10.1016/S1473-3099(20)30198-5 [Epub ahead of print]  
6  
7  
8 14. Du W, Yu J, Wang H, Zhang X, Zhang S, Li Q, et al. Clinical characteristics of COVID-19 in  
9 children compared with adults in Shandong Province, China. *Infection* 2020: 1–8. doi:  
10 10.1007/s15010-020-01427-2 [Epub ahead of print].  
11  
12  
13 15. National Centre for immunization research and surveillance. COVID-19 in schools—the  
14 experience in NSW; 2020. [http://ncirs.org.au/sites/default/files/2020-](http://ncirs.org.au/sites/default/files/2020-04/NCIRS%20NSW%20Schools%20COVID_Summary_FINAL%20public_26%20April%202020.pdf)  
15 [04/NCIRS%20NSW%20Schools%20COVID\\_Summary\\_FINAL%20public\\_26%20April%202020.pdf](http://ncirs.org.au/sites/default/files/2020-04/NCIRS%20NSW%20Schools%20COVID_Summary_FINAL%20public_26%20April%202020.pdf)  
16  
17  
18  
19 16. Posfay-Barbe KM, Wagner N, Gauthey M, et al. COVID-19 in children and the  
20 dynamics of infection in families. *Pediatrics*. 2020; doi: 10.1542/peds.2020-1576  
21  
22  
23 17. National Institute for Public Health and the Environment. Ministry of Health, Welfare and  
24 Sport. Netherlands. Children and COVID-19. Accessed 05/27/2020:  
25 <https://www.rivm.nl/en/novel-coronavirus-covid-19/children-and-covid-19>  
26  
27  
28  
29 18. Heavey L , Casey G , Kelly C , Kelly D , McDarby G . No evidence of secondary transmission  
30 of COVID-19 from children attending school in Ireland, 2020. *Euro Surveill*.  
31 2020;25(21):pii=2000903. <https://doi.org/10.2807/1560-7917.ES.2020.25.21.2000903>  
32  
33  
34 19. Carlos III Public Health Institute. Ministerio de Sanidad. Estudio ENE-COVID19: primera  
35 ronda. Estudio Nacional de sero-epidemiología. Informe preliminar 13/05/2020.  
36 [https://www.ciencia.gob.es/stfls/MICINN/Ministerio/FICHEROS/ENECOVID\\_Informe\\_prelimina](https://www.ciencia.gob.es/stfls/MICINN/Ministerio/FICHEROS/ENECOVID_Informe_preliminar_cierre_primera_ronda_13Mayo2020.pdf)  
37 [r\\_cierre\\_primera\\_ronda\\_13Mayo2020.pdf](https://www.ciencia.gob.es/stfls/MICINN/Ministerio/FICHEROS/ENECOVID_Informe_preliminar_cierre_primera_ronda_13Mayo2020.pdf)  
38  
39  
40 20. Wallinga J, Teunis P, Kretzschmar M. Using data on social contacts to estimate age-specific  
41 transmission parameters for respiratory spread infectious agents. *Am J Epidemiol* 2006; 164:  
42 936–44.  
43  
44  
45 21. Viner RM, Russell SJ, Croker H, Packer J, Ward J, Stansfield C, et al. School closure and  
46 management practices during coronavirus outbreaks including COVID-19: a rapid systematic  
47 review. *Lancet Child Adolesc Health* 2020; 4: 397–404.  
48  
49  
50 22. Cristiani L, Mancino E, Matera L, Nenna R, Pierangeli A, Scagnolari A, et al. Will children  
51 reveal their secret? The coronavirus dilemma. *Eur Respir J* 2020: 2000749. doi:  
52 10.1183/13993003.00749-2020 [Epub ahead of print].  
53  
54  
55  
56  
57  
58  
59  
60

- 1  
2  
3 23. Pathak B, Salemi JL, Sobers N, Menard J, Hambleton IR. Intensive care admission in the US  
4 and modeling the number of PICU needed for children. *J Public Health Manag Pract* 2020; doi:  
5 10.1097/PHH.0000000000001190.  
6  
7  
8 24. Bialek S, Gierke R, Hughes M, McNamara LA, Pilishvili T, Skoff T. Coronavirus Disease 2019  
9 in Children — United States. CDC COVID-19 Response Team, CDC COVID-19 Response Team.  
10 *MMWR Morb Mortal Wkly Rep* 2020; 69(14): 422–426. doi: 10.15585/mmwr.mm6914e4  
11  
12 25. Ludvigsson JF. Children are unlikely to be the main drivers of the COVID-19 pandemic  
13 *Acta Paediatr* 2020; doi:10.1111/APA.15371  
14  
15 26. Fretheim A. The role of children in the transmission of SARS-CoV-2-19 – a rapid review  
16 [Barns rolle i spredning av SARS-CoV-19 (Covid-19) – en hurtigoversikt] Rapid review, 2020.  
17 Oslo: Folkehelseinstituttet/Norwegian Institute of Public Health; 2020.  
18  
19 27. Yonker LM, Shen K, Kinane TB. Lessons unfolding from pediatric cases of COVID-19 disease  
20 caused by SARS-CoV-2 infection. *Pediatric Pulmonol* 2020; 55:1085–1086.  
21  
22 28. Jones TC, Mühlemann B, Veith T, Zuchowski M, Hofmann J, Stein A, et al. An analysis of  
23 SARS-CoV-2 viral load by patient age.  
24 [https://zoonosen.charite.de/fileadmin/user\\_upload/microsites/m\\_cc05/virologie-  
25 ccm/dateien\\_upload/Weitere\\_Dateien/analysis-of-SARS-CoV-2-viral-load-by-patient-age.pdf](https://zoonosen.charite.de/fileadmin/user_upload/microsites/m_cc05/virologie-ccm/dateien_upload/Weitere_Dateien/analysis-of-SARS-CoV-2-viral-load-by-patient-age.pdf)  
26  
27 29. Pearce N, Vandenbroucke JP, VanderWeele TJ, Greenland S. Accurate Statistics on COVID-  
28 19 Are Essential for Policy Guidance and Decisions. *Am J Public Health* 2020;e1-e3. doi:  
29 10.2105/AJPH.2020.305708.  
30  
31 30. Zimmermann P, Curtis N. Coronavirus Infections in Children Including COVID-19: An  
32 Overview of the Epidemiology, Clinical Features, Diagnosis, Treatment and Prevention Options  
33 in Children. *Pediatr Infect Dis J* 2020; 39(5): 355–368. doi: 10.1097/INF.0000000000002660  
34  
35 31. Hasan A, Mehmood N, Fergie J. Coronavirus Disease (COVID-19) and Pediatric Patients: A  
36 Review of Epidemiology, Symptomatology, Laboratory and Imaging Results to Guide the  
37 Development of a Management Algorithm. *Cureus* 2020; 12(3): e7485. DOI  
38 10.7759/cureus.7485.  
39  
40 32. Goldhagen JL, Shenoda S, Oberg C, Mercer R, Kadir A, Raman S, et al. Rights, justice, and  
41 equity: a global agenda for child health and wellbeing. *Lancet Child Adolesc Health* 2019;  
42 [https://doi.org/10.1016/S2352-4642\(19\)30346-3](https://doi.org/10.1016/S2352-4642(19)30346-3).  
43  
44  
45  
46  
47  
48  
49  
50  
51  
52  
53  
54  
55  
56  
57  
58  
59  
60

**Table 1. Characteristics of included studies and main results**

| First author / Journal                                      | Type of study                    | Publication date | Country                                                                            | N total population               | Number of pediatric cases                                                                       | Asymptomatics                                            | Source of transmission / Observations                                                                                                                |
|-------------------------------------------------------------|----------------------------------|------------------|------------------------------------------------------------------------------------|----------------------------------|-------------------------------------------------------------------------------------------------|----------------------------------------------------------|------------------------------------------------------------------------------------------------------------------------------------------------------|
| Cao et al. <sup>6</sup><br>J Formosan Med Assoc             | Review of reported cases         | 02/26            | China / Taiwan                                                                     | 44672 laboratory confirmed cases | Number of reported cases comparing with adult population was 0.9% for <10y, and 1.2% for 10-20y | Most showed mild symptoms. No data on asymptomatic cases | Mainly intra-familial cluster circles. Children could become the main spreader when their infection is mild /Stool could be a source of transmission |
| Dong et al. <sup>7</sup><br>Pediatrics                      | Epidemiology of pediatrics cases | 03/17            | China/<br>Cases recruited from the China Center for Disease Control and prevention | -                                | 2143 pediatric cases reported; 34% onfirmed; 66% suspected                                      | 44% asymptomatics                                        | Not confirmed but family transmission seems to be the main source of cases                                                                           |
| Ji Young Park et al. <sup>8</sup><br>J Korean Med Sci       | A case study. Brief report       | 03/16            | Korea                                                                              | -                                | A 10y old girl. 1rst case detected in Korea                                                     | Mild symptoms                                            | Close contact of her uncle and mother who were confirmed                                                                                             |
| Hai T Le et al. <sup>9</sup><br>Lancet Child Adolesc Health | A case -study                    | 03/23            | Vietnam                                                                            | -                                | 3 months old girl. 1rst case of infant detected in Vietnam                                      | Nasopharyngeal swabs positive                            | Contact with her grandmother who was confirmed                                                                                                       |
| Lu X et al. <sup>10</sup>                                   | Correspondence. Serie of cases   | 03/18            | China                                                                              | Children treated                 | 171/1391 tested were (+).                                                                       | 15% asymptomatic. Three patients                         | 90% confirmed family cluster                                                                                                                         |

|                                                        |                                                |       |             |                                                                     |                                                               |                                                                                              |                                                                                                                                 |
|--------------------------------------------------------|------------------------------------------------|-------|-------------|---------------------------------------------------------------------|---------------------------------------------------------------|----------------------------------------------------------------------------------------------|---------------------------------------------------------------------------------------------------------------------------------|
| New England J Med                                      |                                                |       |             | at the Wuhan Children's Hospital                                    |                                                               | required PICU (all with previous chronic conditions)                                         |                                                                                                                                 |
| Chang et al. <sup>11</sup><br>J Formosan Med Assoc     | Systematic review of 9 case series             | 02/26 | China       |                                                                     | 93 cases                                                      | 26% asymptomatics                                                                            | 75% family contact                                                                                                              |
| Su L, et al. <sup>12</sup><br>Emerg Microbe Infections | Serie of cases                                 | 03/12 | China       | -                                                                   | 9 cases from 14 families, ages 11 months to 9y                | 6 cases asymptomatics. The rest of children with mild symptoms and recovered after 2-3 weeks | Family transmission. Five discharged children were admitted again because their stool showed positive result in SARS-CoV-2 PCR. |
| Qiu et al. <sup>13</sup><br>Lancet Infec Dis           | Serie of cases                                 | 03/25 | China       | N total= 616                                                        | 36 cases (6%) in children.                                    | Half of them asymptomatics                                                                   | Family contact                                                                                                                  |
| Du W et al. <sup>14</sup><br>Infection                 | Serie of cases (families)                      | 03/23 | China       | 53 adults                                                           | 14 children                                                   | 8 out of 14 children asymptomatic                                                            | All cases family clusters                                                                                                       |
| NCIRS <sup>15</sup>                                    | Reported cases from New South Wales schools.   | 04/26 | Australia   | 18 cases (9 staff school members and 9 students) during March-April | 9 cases of students from 10 high schools and 5 primary school | No data                                                                                      | 863 analysed contacts of students: 1 case detected                                                                              |
| Posfay-Barbe et al. <sup>16</sup><br>Pediatrics        | Serie of cases from Geneva University Hospital | 05/27 | Switzerland | 4710 total cases. Familial cluster evaluation                       | 40 cases (0.9%) <16y                                          | 1 asymptomatic                                                                               | 8% (n=3) developed symptoms before other family members                                                                         |

|                                                  |                                                          |       |             |                                                                                                                 |                                                      |                                                    |                                                                                                                                                                                                        |
|--------------------------------------------------|----------------------------------------------------------|-------|-------------|-----------------------------------------------------------------------------------------------------------------|------------------------------------------------------|----------------------------------------------------|--------------------------------------------------------------------------------------------------------------------------------------------------------------------------------------------------------|
| RIVM <sup>17</sup>                               | National Institute for Public Health and the Environment | 05/27 | Netherlands | Study in households: 239 participants, including 185 housemates. This involves 123 adults                       | 116 children between 1 -16 years.                    | No data                                            | There are no indications that children younger than 12 years old were the first in the family to be infected.                                                                                          |
| Heavey L, et al. <sup>18</sup> Euro Surveill     | National Public Health Emergency                         | 05/28 | Ireland     | Study of school contacts of 3 cases on children 10-15y before 03/12/2020                                        | 125; 222; 475 school contacts analysed, respectively | One case asymptomatic                              | No secondary school cases detected                                                                                                                                                                     |
| Carlos III Public Health Institute <sup>19</sup> | ENE-COVID-19 study: first wave                           | 05/13 | Spain       | Study of IgG antibody in a representative sample of Spanish population (N total participant population = 60897) | 8243 children <15y.                                  | No data on available on symptoms stratified by age | Prevalence of IgG:<br><1 year = 1.1% (95% confidence interval: 0.3-3.8%)/ 1 -4 years= 2.2% (1.4-3.6) / 5 -9 years = 3% (2.3-4.1)/ 10-14 years = 3.9% (3.1-4 , 9)<br>General population = 5% (4.7-5.4). |

NCIRS: National Centre for immunization research and surveillance, New South Wales; RIVM: National Institute for Public Health and the Environment, the Netherlands

1  
2  
3  
4  
5  
6  
7  
8  
9  
10  
11  
12  
13  
14  
15  
16  
17  
18  
19  
20  
21  
22  
23  
24  
25  
26  
27  
28  
29  
30  
31  
32  
33  
34  
35  
36  
37  
38  
39  
40  
41  
42  
43  
44  
45  
46  
47  
48  
49  
50  
51  
52  
53  
54  
55  
56  
57  
58  
59  
60

Figure 1. Search flow.



229x205mm (96 x 96 DPI)
